# Supplementary material
Source: PubMed Central journal article supplement (PMC9007892)
Supplement: NIHMS1770215-supplement-supinfo.pdf [file NIHMS1770215-supplement-supinfo.pdf]

# Supplementary Material for “Two-step hypothesis testing to detect gene-environment interactions in a genome-wide scan with a survival endpoint”

Eric S. Kawaguchi, Gang Li, Juan Pablo Lewinger, W. James Gauderman

## Proof of Theorem 1

Let  $\hat{\omega} = (\hat{\omega}_G, \hat{\omega}_E)$  and  $\hat{\gamma} = (\hat{\gamma}_G, \hat{\gamma}_E, \hat{\gamma}_{G \times E}) = (\hat{\gamma}_1, \hat{\gamma}_{G \times E})$ . Under the null hypothesis  $H_0 : \gamma_{G \times E} = 0$ ,  $\gamma_0 = (\gamma_G, \gamma_E, 0) = (\gamma_1, 0)$ , where  $\gamma_1 = (\gamma_G, \gamma_E)^T$ . Suppose the regularity conditions in Andersen and Gill (1982) hold. Then we have

$$\sqrt{n}(\hat{\omega} - \gamma_1) = I_{11}^{-1} \mathbf{U}_1 + o_p(1),$$

where  $\mathbf{U}_1$  is the vector of derivatives of the log-partial likelihood of (3) with respect to  $\omega$  and  $I_{11} = E(\mathbf{U}_1 \mathbf{U}_1^T)$ . Furthermore,

$$\sqrt{n}(\hat{\gamma} - \gamma_0) = \sqrt{n} \begin{pmatrix} \hat{\gamma}_1 - \gamma_1 \\ \hat{\gamma}_{G \times E} - 0 \end{pmatrix} = \begin{bmatrix} I_{11} & I_{21} \\ I_{21} & I_{22} \end{bmatrix}^{-1} \begin{pmatrix} \mathbf{U}_1 \\ \mathbf{U}_2 \end{pmatrix} + o_p(1)$$

where  $I_{jk} = E(U_j U_k^T)$  for  $j, k = 1, 2$  and where  $\mathbf{U}_1$  and  $\mathbf{U}_2$  are the vector of derivatives of the log-partial likelihood of (1) with respect to  $\gamma_1$  and  $\gamma_{G \times E}$ , respectively. Using the properties of symmetric block matrices,

$$\sqrt{n} \begin{pmatrix} \hat{\gamma}_1 - \gamma_1 \\ \hat{\gamma}_{G \times E} - 0 \end{pmatrix} = \begin{bmatrix} (I_{11} - I_{12} I_{22}^{-1} I_{21})^{-1} & -(I_{11} - I_{12} I_{22}^{-1} I_{21})^{-1} I_{12} I_{22}^{-1} \\ -(I_{22} - I_{21} I_{11}^{-1} I_{12})^{-1} I_{21} I_{11}^{-1} & (I_{22} - I_{21} I_{11}^{-1} I_{12})^{-1} \end{bmatrix} \begin{pmatrix} \mathbf{U}_1 \\ \mathbf{U}_2 \end{pmatrix} + o_p(1)$$

Now

$$\begin{aligned} Cov\{\sqrt{n}(\hat{\omega} - \gamma_1), \sqrt{n}(\hat{\gamma}_{G \times E} - 0)\} &= Cov\{I_{11}^{-1} \mathbf{U}_1, -(I_{22} - I_{21} I_{11}^{-1} I_{12})^{-1} I_{21} I_{11}^{-1} \mathbf{U}_1 \\ &\quad + (I_{22} - I_{21} I_{11}^{-1} I_{12})^{-1} \mathbf{U}_2\} + o_p(1) \\ &= -I_{11}^{-1} E(\mathbf{U}_1 \mathbf{U}_1^T) \{(I_{22} - I_{21} I_{11}^{-1} I_{12})^{-1} I_{21} I_{11}^{-1}\}^T \\ &\quad + I_{11}^{-1} E(\mathbf{U}_1 \mathbf{U}_2^T) \{(I_{22} - I_{21} I_{11}^{-1} I_{12})^{-1}\}^T + o_p(1) \\ &\xrightarrow{p} -I_{11}^{-1} I_{12} \{(I_{22} - I_{21} I_{11}^{-1} I_{12})^{-1}\}^T \\ &\quad + I_{11}^{-1} I_{12} \{(I_{22} - I_{21} I_{11}^{-1} I_{12})^{-1}\}^T \\ &= \mathbf{0}. \end{aligned}$$

Therefore  $\hat{\omega}$  and  $\hat{\gamma}_{G \times E}$  are asymptotically independent and the proof is complete.

If one is interested in including subject-level adjustment covariates,  $V$ , to the analysis, then the results of our theorem will also hold as long as  $V$  is included in both (3) and (1).

## S1 Additional Tables and Figures

Table S1: Estimated Type I error rates for tests of  $G \times E$  interaction across several parameter settings under model misspecification. Each estimate of Type I error is based on the proportion of 10,000 replicate datasets for which the indicated procedure identified at least one statistically significant result (at the  $FWER = 0.05$ ) among the  $M = 10,000$  biomarkers. For the subset screening step, a filtering statistic of  $\alpha_1 = 0.05$  was used. For the weighted Bonferroni test, an initial bin size of  $B = 5$  was used. The data were generated based on the following model:  $h(t|G, E, V) = h_0(t) \exp\{G \times \gamma_G + E \times \gamma_E + V \times \gamma_V + (G \times E)\gamma_{G \times E}\}$ , where  $\gamma_G = 0$ ,  $\gamma_E = \log(0.6)$ , and  $\gamma_{G \times E} = 0$ . Categorical:  $V \in \{0, 1, 2, 3\}$  with equal probability; Continuous:  $V \sim N(0, 1)$ ; Uniform:  $V \sim U(0, 1)$ . See Section 3.2 in the main text for details on the simulation settings.

|             |          | Standard   |       | Two-Step Methods |          |                 |          |
|-------------|----------|------------|-------|------------------|----------|-----------------|----------|
|             |          |            |       | $mG G \times E$  |          | $cG G \times E$ |          |
|             | $V$      | $\gamma_V$ | GWIS  | Subset           | Weighted | Subset          | Weighted |
| Continuous  | log(1.4) |            | 0.053 | 0.078            | 0.093    | 0.050           | 0.050    |
|             | log(1.2) |            | 0.054 | 0.089            | 0.107    | 0.053           | 0.050    |
|             | log(0.8) |            | 0.051 | 0.081            | 0.095    | 0.052           | 0.048    |
|             | log(0.6) |            | 0.053 | 0.070            | 0.076    | 0.052           | 0.051    |
|             | log(0.4) |            | 0.052 | 0.059            | 0.064    | 0.053           | 0.050    |
| Uniform     | log(1.4) |            | 0.054 | 0.088            | 0.108    | 0.052           | 0.049    |
|             | log(1.2) |            | 0.054 | 0.087            | 0.110    | 0.051           | 0.050    |
|             | log(0.8) |            | 0.050 | 0.085            | 0.098    | 0.052           | 0.047    |
|             | log(0.6) |            | 0.052 | 0.079            | 0.093    | 0.051           | 0.049    |
|             | log(0.4) |            | 0.053 | 0.071            | 0.079    | 0.050           | 0.048    |
| Categorical | log(1.4) |            | 0.051 | 0.081            | 0.103    | 0.054           | 0.054    |
|             | log(1.2) |            | 0.052 | 0.089            | 0.103    | 0.056           | 0.051    |
|             | log(0.8) |            | 0.052 | 0.073            | 0.084    | 0.049           | 0.048    |
|             | log(0.6) |            | 0.048 | 0.058            | 0.060    | 0.050           | 0.051    |
|             | log(0.4) |            | 0.051 | 0.050            | 0.052    | 0.049           | 0.050    |

Table S2: Descriptive statistics of the taxane-anthracycline study. Data collected from the Taxane + Anthracycline and Anthracycline only study were obtained from GSE25066 and GSE16446, respectively. Age and tumor grade were the only two characteristics that overlapped and were comparable between both studies.

|             | Taxane + Anthracycline | Anthracycline only |
|-------------|------------------------|--------------------|
| N           | 507                    | 107                |
| 5-year DFS  | 0.73 (0.68, 0.78)      | 0.75 (0.65, 0.85)  |
| Age (> 50)  | 41 (38%)               | 231 (46%)          |
| Tumor Grade |                        |                    |
| 1           | 2 (2%)                 | 32 (6%)            |
| 2           | 19 (18%)               | 179 (35%)          |
| 3           | 81 (75%)               | 259 (52%)          |
| NA          | 5 (5%)                 | 37 (7%)            |
| HER2 Status |                        |                    |
| Positive    | 6 (1%)                 | 29 (27%)           |
| Negative    | 485 (95%)              | 53 (49%)           |
| Unknown     | 17 (4%)                | 25 (24%)           |
| ErbB2       |                        |                    |
| Positive    | 29 (6%)                | 27 (25%)           |
| Negative    | 479 (95%)              | 80 (75%)           |

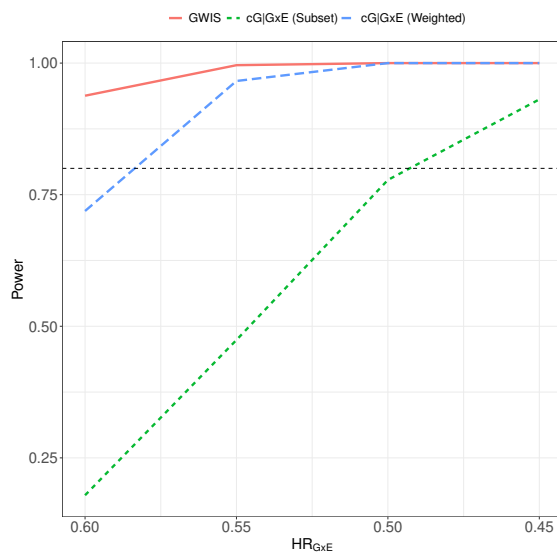

Figure S1: Power comparison between the standard GWIS approach and the  $cG|G \times E$  two-step GWIS when  $\gamma = (\log(1.2), \log(0.6), \gamma_{G \times E})$  with  $\gamma_{G \times E} \in (\log(0.45), \log(0.60))$ . See Section 3.2 in the main text for details of the simulation setup (Standard GWIS - Solid Red Line;  $cG|G \times E$  with weighted screening - Dashed Green Line;  $mG|G \times E$  with weighted screening - Dashed Blue Line).

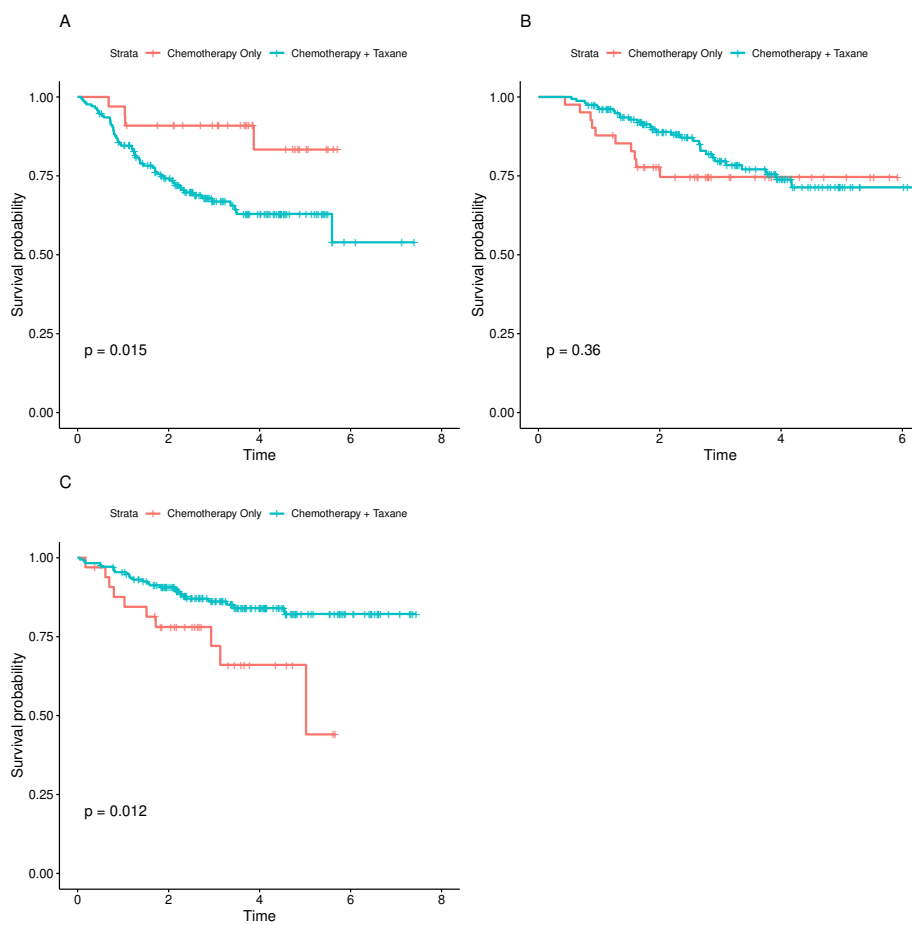

Figure S2: Kaplan-Meier curves comparing RNASE4-treatment effects on distant relapse-free survival. RNASE4 gene expression levels were divided into tertiles; A) AKAP9 levels  $\leq -0.56$ ; B) AKAP9 levels  $(-0.567, 0.290)$ ; C) AKAP9 levels  $\geq 0.290$ . P-values are calculated using an un-weighted log-rank test.

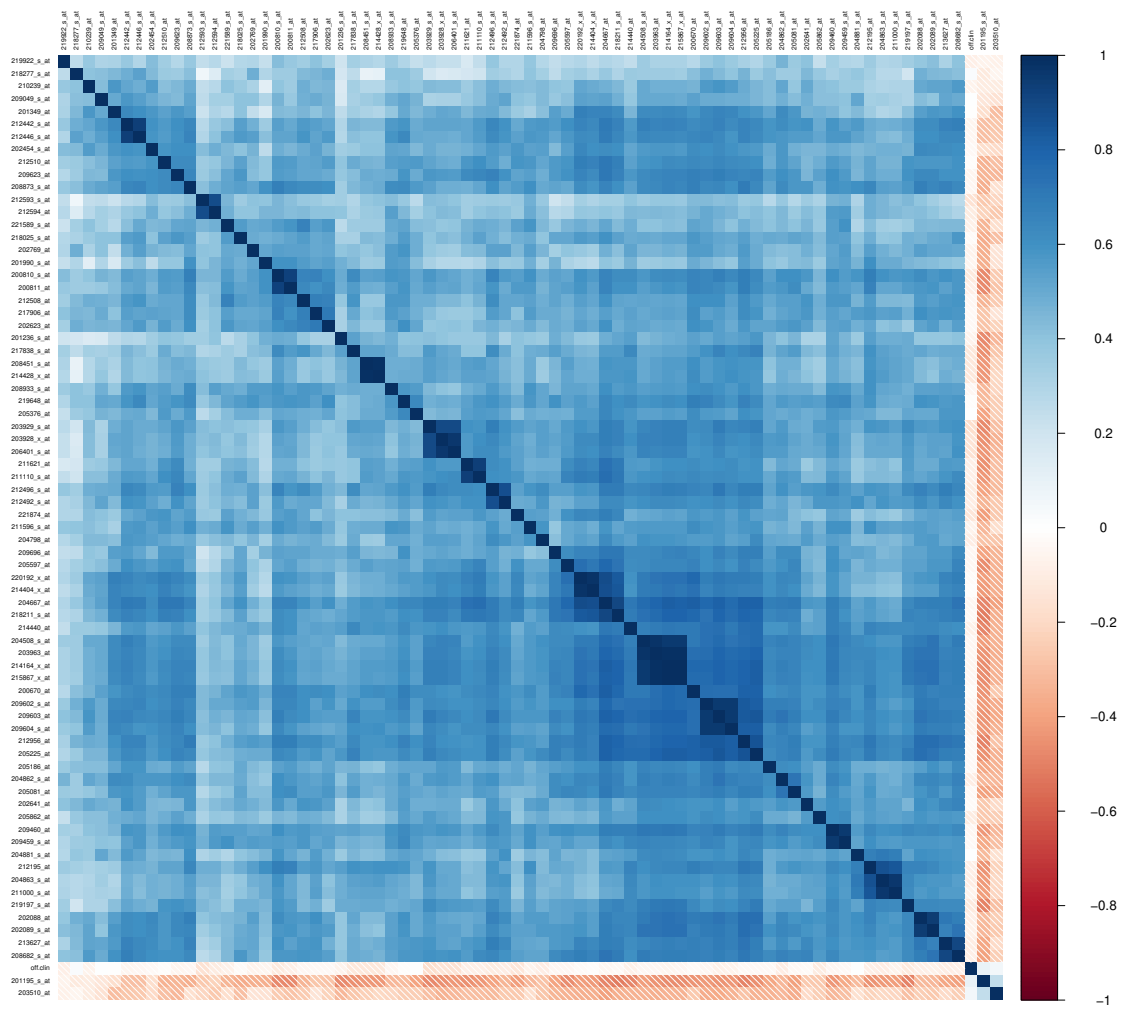

Figure S3: Hierarchically clustered correlation plot of the 70 gene expression levels that were included in Bins 1-4 using the weighted hypothesis testing approach.
